# Supplementary material
Source: publisher figshare collection journal article supplement (https://frontiersin.figshare.com/ndownloader/files/21980694)
Supplement: Supplementary file [file 21980694]

## Supplementary Material

### Supplementary Figures

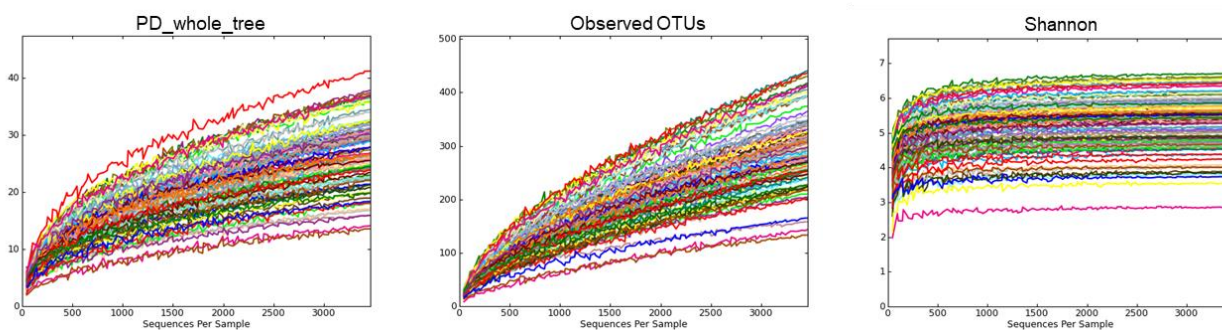

**Supplementary Figure 1. Rarefaction curves.** The following metrics were used: phylogenetic diversity (PD\_whole\_tree), the number of observed OTUs and the Shannon index. Curves are color-coded by subject.

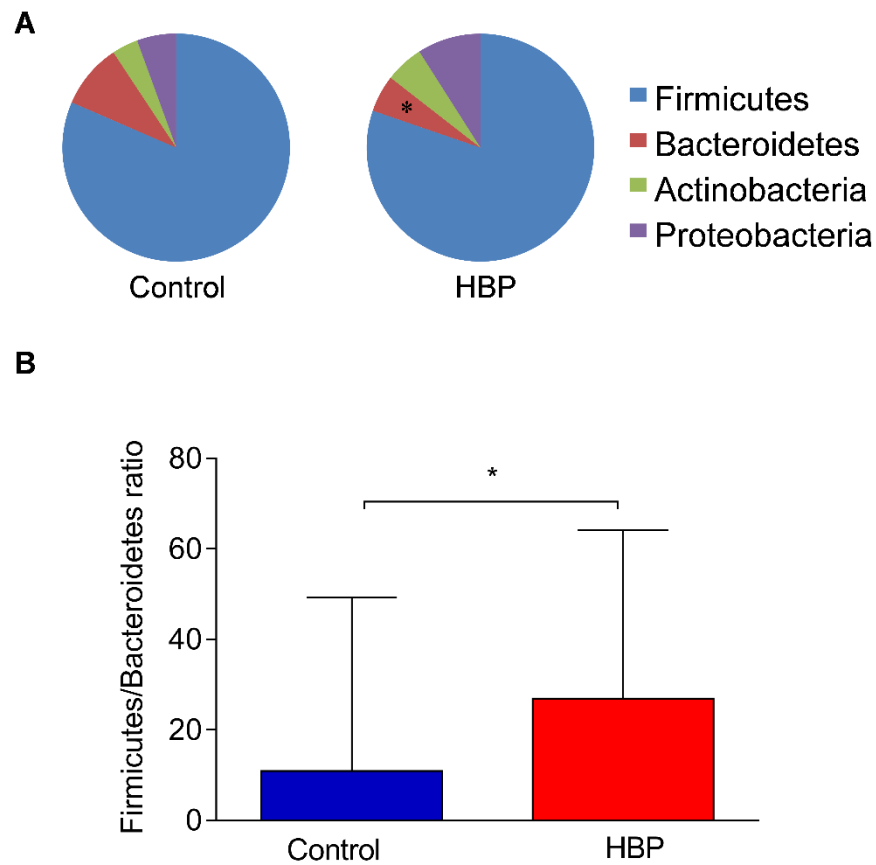

**Supplementary Figure 2. Phylum-level gut microbiota composition in hypertensive (HBP) and normotensive (control) subjects. A.** Pie charts summarizing the relative abundance of the four most abundant phyla in HBP subjects and controls. **B.** Firmicutes/Bacteroidetes ratio. \*,  $p=0.03$ , Mann-Whitney U test.

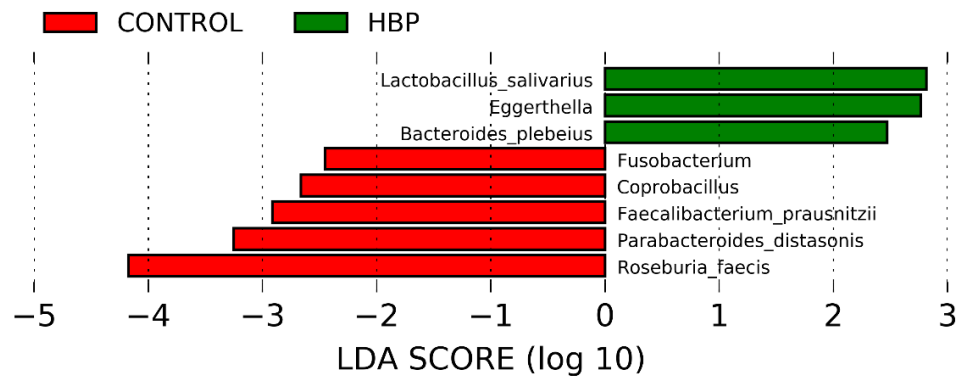

**Supplementary Figure 3. Intestinal microbiota species potentially driving the separation between hypertensive (HBP) and normotensive (control) subjects.** Linear discriminant analysis (LDA) effect size (LEfSe) analysis. LDA scores indicate differentially represented species between groups (the logarithmic threshold for discriminative features was set to 2.0). For *Eggerthella*, *Fusobacterium* and *Coprobacillus*, the species were unclassified.

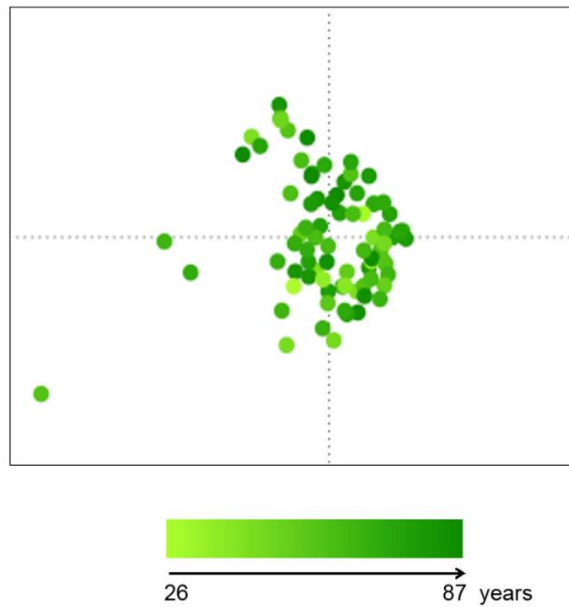

**Supplementary Figure 4. The gut microbiota dysbiosis in a cohort of Brazilian hypertensive subjects is independent of age.** Principal Coordinates Analysis of the weighted UniFrac distances for hypertensive and control subjects. Dots are colored by subject age (see the color gradient at the bottom). See also Figure 1B.

## Supplementary Tables

**Supplementary Table 1.** Frequency of macronutrients intake in high blood pressure group (HBP) and control group (Control).

|         | Macronutrient |     |              |
|---------|---------------|-----|--------------|
|         | Protein       | Fat | Carbohydrate |
| Total   | 19%           | 28% | 53%          |
| Control | 17%           | 26% | 57%          |
| HBP     | 19%           | 30% | 51%          |

**Supplementary Table 2.** Summary of published studies on human gut microbiota and hypertension. Only research articles based on next-generation sequencing technologies were considered. Genus-level differences between hypertensive (case) and normotensive (control) subjects or associations with blood pressure are reported. Results consistent with our study are highlighted in bold.

| Number of subjects and characteristics <sup>a</sup>         | Geographical origin | Positively associated with or increased in relative abundance in hypertension                                                                                                                                                                                                                                                                                                                                                      | Negatively associated with or decreased in relative abundance in hypertension                                                                                                                                                                                                                                                                                                                                                                                                                                                                                                                                                                                                                                                                            | Ref.                |
|-------------------------------------------------------------|---------------------|------------------------------------------------------------------------------------------------------------------------------------------------------------------------------------------------------------------------------------------------------------------------------------------------------------------------------------------------------------------------------------------------------------------------------------|----------------------------------------------------------------------------------------------------------------------------------------------------------------------------------------------------------------------------------------------------------------------------------------------------------------------------------------------------------------------------------------------------------------------------------------------------------------------------------------------------------------------------------------------------------------------------------------------------------------------------------------------------------------------------------------------------------------------------------------------------------|---------------------|
| 99 cases (53.6 yrs, 6.1%)<br>41 controls (53.7 yrs, 21.9%)  | Tangshan,<br>China  | <i>Prevotella</i> , <i>Klebsiella</i> ,<br><i>Porphyromonas</i> , and <i>Actinomyces</i>                                                                                                                                                                                                                                                                                                                                           | <i>Faecalibacterium</i> , <i>Bacteroides</i> ,<br><i>Oscillibacter</i> , <b><i>Roseburia</i></b> ,<br><i>Bifidobacterium</i> , <b><i>Coprococcus</i></b> , and<br><i>Butyrivibrio</i>                                                                                                                                                                                                                                                                                                                                                                                                                                                                                                                                                                    | Li et al.,<br>2017  |
| 60 cases (57.0 yrs, 41.7%)<br>60 controls (56.0 yrs, 46.7%) | Harbin,<br>China    | <i>Klebsiella</i> , <i>Clostridium</i> ,<br><i>Streptococcus</i> , <i>Parabacteroides</i> ,<br><b><i>Eggerthella</i></b> , <i>Salmonella</i> ,<br><b><i>Bacteroides</i></b> , <i>Sutterella</i> , and<br><i>Pyramidobacter</i>                                                                                                                                                                                                     | <i>Faecalibacterium</i> , <b><i>Roseburia</i></b> ,<br><i>Synergistetes</i> , <b><i>Bacteroides</i></b> ,<br><i>Megasphaera</i> , and <i>Aeromicrobium</i>                                                                                                                                                                                                                                                                                                                                                                                                                                                                                                                                                                                               | Yan et<br>al., 2017 |
| 22 cases (NA)<br>18 controls (NA)                           | Florida,<br>US      | <i>Alistipes</i> , <i>Ruminococcus</i> , and<br><i>Eubacterium</i>                                                                                                                                                                                                                                                                                                                                                                 | <b><i>Bacteroides</i></b>                                                                                                                                                                                                                                                                                                                                                                                                                                                                                                                                                                                                                                                                                                                                | Kim et<br>al., 2018 |
| 62 cases (69.3 yrs, 53.2%)<br>67 controls (69.5 yrs, 61.0%) | Beijing,<br>China   | <i>Alistipes</i> , <b><i>Bacteroides</i></b> , <i>Barnesiella</i> ,<br><i>Butyricimonas</i> , <i>Christensenella</i> ,<br><i>Clostridium sensu stricto</i> ,<br><i>Cosenzaea</i> , <i>Desulfovibrio</i> , <i>Dialister</i> ,<br><i>Eisenbergiella</i> , <i>Faecalitalea</i> ,<br><i>Megasphaera</i> , <i>Microvirgula</i> ,<br><i>Mitsuokella</i> , <i>Parabacteroides</i> ,<br><i>Proteiniborus</i> , and <i>Terrisporobacter</i> | <i>Acidaminobacter</i> , <i>Adlercreutzia</i> ,<br><i>Anaerotruncus</i> , <i>Asteroleplasma</i> ,<br><i>Bulleidia</i> , <i>Cellulosilyticum</i> ,<br><i>Clostridium III</i> , <b><i>Clostridium IV</i></b> ,<br><b><i>Clostridium XIVa</i></b> , <i>Coprobacter</i> ,<br><i>Enterococcus</i> , <i>Enterorhabdus</i> ,<br><i>Flavonifractor</i> , <i>Gemmiger</i> ,<br><i>Guggenheimella</i> , <i>Intestinimonas</i> ,<br><b><i>Lachnospiracea incertae sedis</i></b> ,<br><i>Lactivibrio</i> , <i>Lactobacillus</i> ,<br><i>Macellibacteroides</i> , <i>Marvinbryantia</i> ,<br><i>Olsenella</i> , <i>Paraprevotella</i> ,<br><i>Parasutterella</i> ,<br><i>Phascolarctobacterium</i> , <i>Prevotella</i> ,<br><i>Romboutsia</i> , <i>Ruminococcus</i> , | Dan et<br>al., 2019 |

|                                                             |                                                        |                                                                                                                                                                                                                                                                                                        |                                                                                                                                                                                                                                                                                                                                   |                            |
|-------------------------------------------------------------|--------------------------------------------------------|--------------------------------------------------------------------------------------------------------------------------------------------------------------------------------------------------------------------------------------------------------------------------------------------------------|-----------------------------------------------------------------------------------------------------------------------------------------------------------------------------------------------------------------------------------------------------------------------------------------------------------------------------------|----------------------------|
|                                                             |                                                        |                                                                                                                                                                                                                                                                                                        | <i>Sporobacter</i> , <i>Sporobacterium</i> ,<br><i>Sutterella</i> , <i>Vampirovibrio</i> ,<br><i>Veillonella</i> , and <i>Victivallis</i>                                                                                                                                                                                         |                            |
| 38 cases (52.5 yrs, 0%)<br>9 controls (46.2 yrs, 0%)        | Liège,<br>Belgium                                      | <i>Clostridium sensu stricto</i>                                                                                                                                                                                                                                                                       | <b>Ruminococcaceae*</b> , and<br><i>Clostridiales*</i>                                                                                                                                                                                                                                                                            | Huart et<br>al., 2019      |
| 63 cases (58.4 yrs, 44.4%)<br>42 controls (59.3 yrs, 59.5%) | Xinxiang<br>county,<br>China                           | <i>Tyzzelerella</i> , <i>Enterobacter</i> ,<br><i>Actinobacillus</i> , <i>Sutterella</i> ,<br><i>Parasutterella</i> , <i>Paenibacillus</i> ,<br><i>Prevotella</i> , <i>Vibrio</i> , <i>Holdemanella</i> ,<br><i>Dongia</i> , <i>Romboutsia</i> ,<br><i>Flavonifractor</i> , and <i>Glutamicibacter</i> | <i>Chitinibacter</i> , <b><i>Bacteroides</i></b> ,<br><i>Faecalitalea</i> , <b><i>Dorea</i></b> ,<br><i>Phascolarctobacterium</i> ,<br><i>Pediococcus</i> , <i>Lachnospira</i> ,<br><i>Megamonas</i> , <b><i>Faecalibacterium</i></b> ,<br><b><i>Fusobacterium</i></b> , <i>Terrimonas</i> , and<br><i>Erysipelatoclostridium</i> | Li et al.,<br>2019         |
| 20 cases (NA)<br>10 controls (NA)                           | Shaanxi,<br>China                                      | <i>Prevotella</i> , <i>Megasphaera</i> ,<br><i>Parasutterella</i> ,<br><i>Phascolarctobacterium</i> , and<br><i>Escherichia-Shigella</i>                                                                                                                                                               | <b><i>Faecalibacterium</i></b>                                                                                                                                                                                                                                                                                                    | Mushtaq<br>et al.,<br>2019 |
| 186 cases (NA)<br>343 controls (NA)                         | Birmingham,<br>Chicago,<br>Minneapolis,<br>Oakland, US | <i>Veillonella</i> , <i>Robinsoniella</i> , and<br><i>Catabacter</i>                                                                                                                                                                                                                                   | <i>Akkermansia</i> , <i>Ruminococcus</i> ,<br><i>Anaerovorax</i> , <i>Sporobacter</i> ,<br><i>Asaccharobacter</i>                                                                                                                                                                                                                 | Sun et<br>al., 2019        |

<sup>a</sup> Mean age and percentage of females are shown in brackets.

NA, not available.

\*, unclassified OTU reported at higher taxonomic level.

## Supplementary References

- Huart, J., Leenders, J., Taminiau, B., Descy, J., Saint-Remy, A., Daube, G., et al. (2019). Gut microbiota and fecal levels of short-chain fatty acids differ upon 24-hour blood pressure levels in men. *Hypertension* 74(4), 1005-1013. doi: 10.1161/HYPERTENSIONAHA.118.12588
- Kim, S., Goel, R., Kumar, A., Qi, Y., Lobaton, G., Hosaka, K., et al. (2018). Imbalance of gut microbiome and intestinal epithelial barrier dysfunction in patients with high blood pressure. *Clin. Sci. (Lond)*. 132(6), 701-718.
- Mushtaq, N., Hussain, S., Zhang, S., Yuan, L., Li, H., Ullah, S., et al. (2019). Molecular characterization of alterations in the intestinal microbiota of patients with grade 3 hypertension. *Int. J. Mol. Med.* 44(2), 513-522. doi: 10.3892/ijmm.2019.4235
